# Supplementary material for: Differential subcellular localization of LC3 in response to chemotherapeutics in lung adenocarcinoma cells
Source: Research Square preprint supplement (doi:10.21203/rs.3.rs-6863058/v1), 2025-06-17
Supplement: Supplementary file 1 [file 21f59ee519de013bbdfa36bb.docx]

**Supp Table 1 - Subcellular localization and pattern of nuclear or cytosolic LC3 and pattern dependent on chemotherapy mechanism of action.**

| **Condition** | **Main mechanism of action (Ref)** | **Cytosolic LC3** | **Nuclear LC3** | **Pattern of nuclear LC3 distribution** |
| --- | --- | --- | --- | --- |
| **Control** | - | ++ | ++ | Punctiform |
| **Cisplatin** | Platinum agent that inhibits DNA synthesis by forming cross-links but also can produce intrastrand cross-linking and DNA breakage (46). | + | ++++ | Punctiform |
| **Etoposide** | Inhibits topoisomerase II, leading to DNA double-strand breaks. (47). | +++ | +++ | Punctiform |
| **Gemcitabine** | Inhibits DNA synthesis by enzyme ribonucleotide reductase and DNA polymerase and blocks the cellular cycle at G1/S-phase (49). | +++ | + | Difuse |
| **Carboplatin** | Inhibits DNA synthesis by forming cross-links but also can produce intrastrand cross-linking and DNA breakage (46). | + | + | Difuse |
| **Paclitaxel** | Inhibits microtubule disassembly, thus compromising intracellular trafficking and mitosis (48). | +++++ | +++ | Punctiform |
|  |  |  |  |  |
